# Supplementary material for: Design of a Composite Based on Polyamide Fabric-Hydrogel-Zinc Oxide Particles to Act as Adsorbent and Photocatalyst
Source: MDPI journal article supplement (doi:10.3390/ma15196649), 2022-09-25
Supplement: s1 [file s1]

## Supporting information

### Design of a Composite Based on Polyamide Fabric-Hydrogel-Zinc Oxide Particles to Act as Adsorbent and Photocatalyst

Daniela Atanasova <sup>1</sup>, Miglena Irikova <sup>1</sup>, Desislava Staneva <sup>1,\*</sup> and Ivo Grabchev <sup>2,\*</sup>

<sup>1</sup> Department of Textile, Leather, and Fuels, University of Chemical Technology and Metallurgy, 1756 Sofia, Bulgaria

<sup>2</sup> Faculty of Medicine, Sofia University St. "Kliment Ohridski", 1407 Sofia, Bulgaria

\* Correspondence: grabcheva@mail.bg (D.S.); i.grabchev@chem.uni-sofia.bg (I.G.)

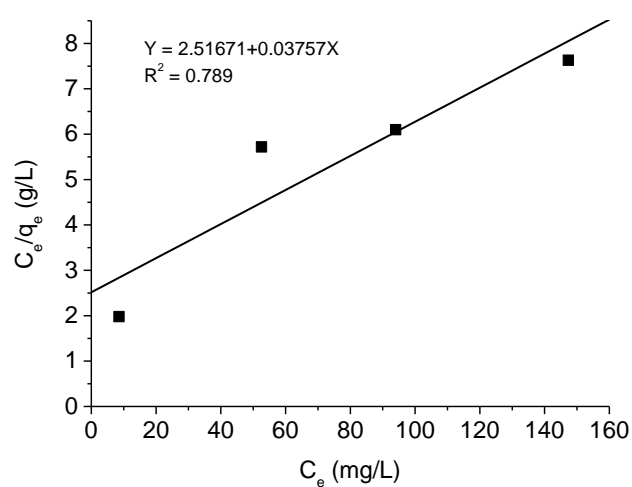

**Figure S1.** Langmuir adsorption isotherm.

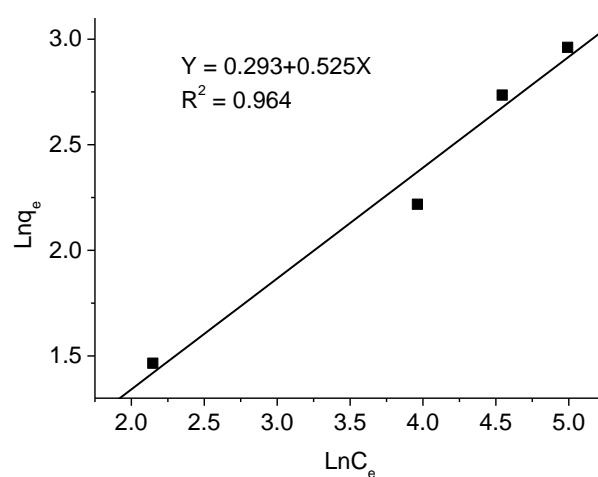

**Figure S2.** Freundlich isotherm.

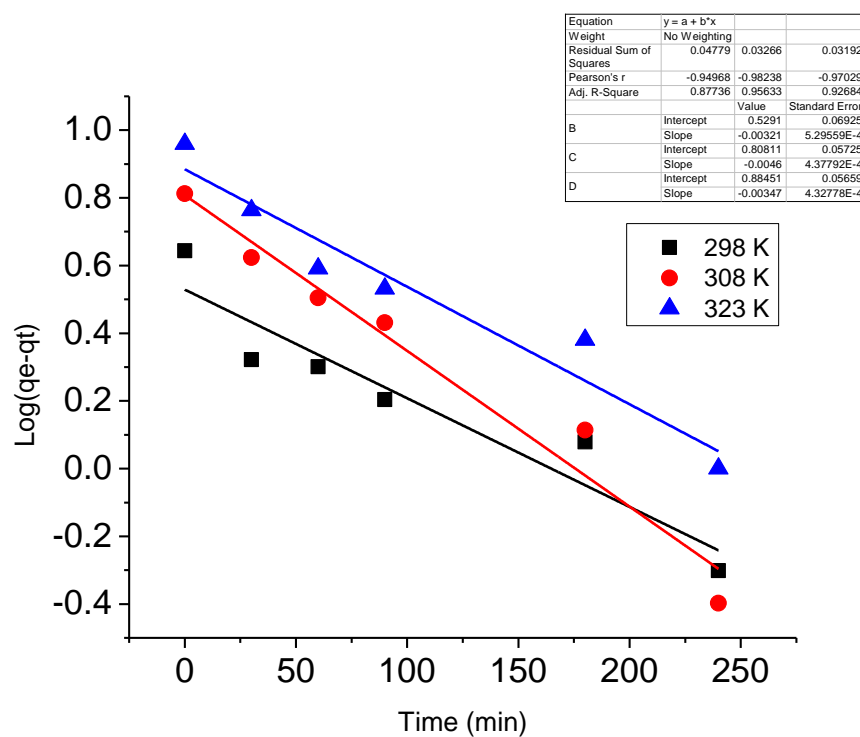

Figure S3. Pseudo-first-order at 298 K, 308 K and 323 K.

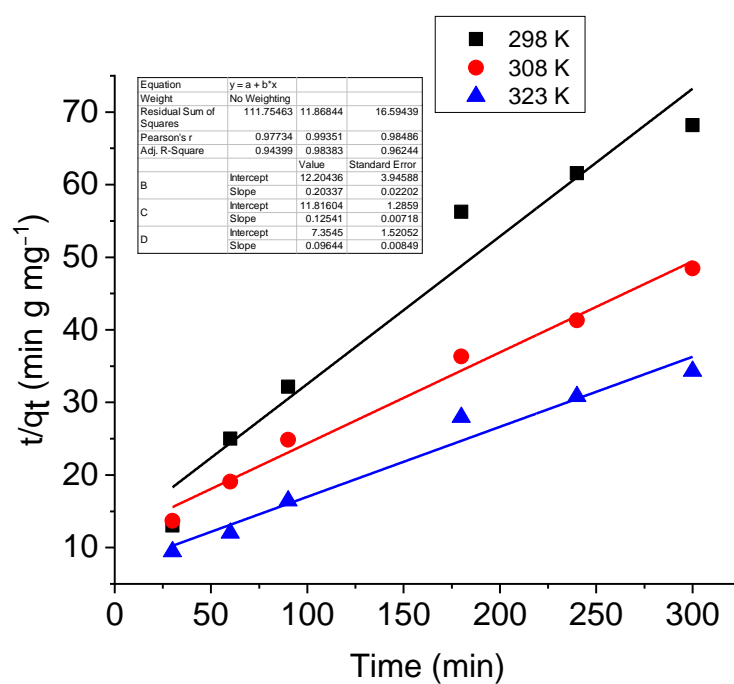

Figure S4. Pseudo-second-order at 298 K, 308 K and 323 K.

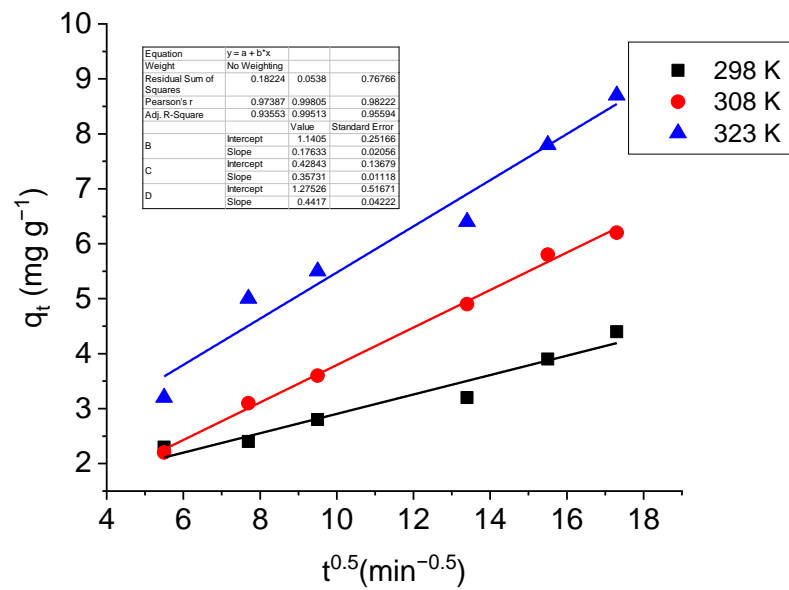

**Figure S5.** Diffusion kinetic model of the dye adsorption onto composite material PA30 at different temperature.

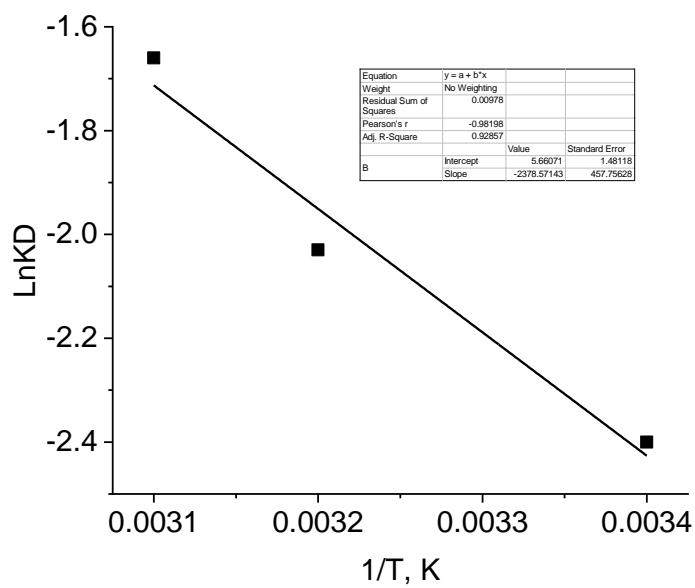

**Figure S6.** Temperature dependence of the distribution coefficient.

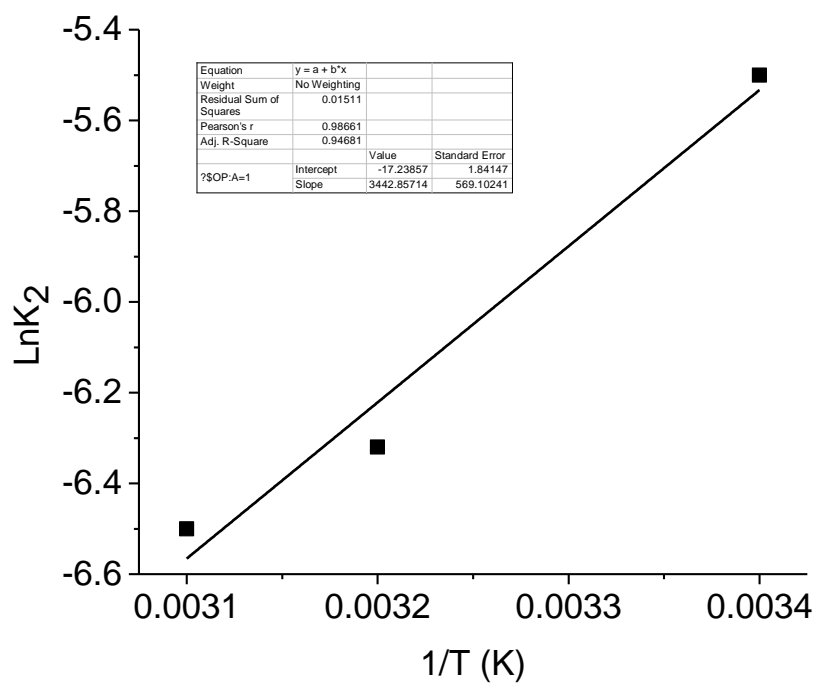

**Figure S7.** Dependence of LnK<sub>2</sub> on 1/T.

**Table S1.** Bacterial growth Log (CFU mL<sup>-1</sup>) after incubation with PA30.

| Strain           | Time of incubation<br>(h) | Log (CFU mL <sup>-1</sup> ) |               |             |
|------------------|---------------------------|-----------------------------|---------------|-------------|
|                  |                           | Control                     | Cotton fabric | PA30        |
| <i>S. aureus</i> | 1                         | 7.9 ± 0.14                  | 8 ± 0.14      | 6.33 ± 0.08 |
|                  | 2                         | 7.8 ± 0.05                  | 8 ± 0.08      | Full kill   |
|                  | 3                         | 7.7 ± 0.1                   | 7.9 ± 0.13    | Full kill   |
| <i>E. coli</i>   | 1                         | 8.9 ± 0.05                  | 8.8 ± 0.11    | 7.1 ± 0.05  |
|                  | 2                         | 8.9 ± 0.14                  | 8.9 ± 0.13    | 7 ± 0.07    |
|                  | 3                         | 8.8 ± 0.1                   | 8.8 ± 0.04    | 7 ± 0.06    |
